# Supplementary material for: Solamargine Inhibits Prostate Cancer Cell Growth and Enhances the Therapeutic Efficacy of Docetaxel via Akt Signaling
Source: Hindawi journal article supplement (doi:10.1155/2022/9055954), 2022-03-10

Figure S1

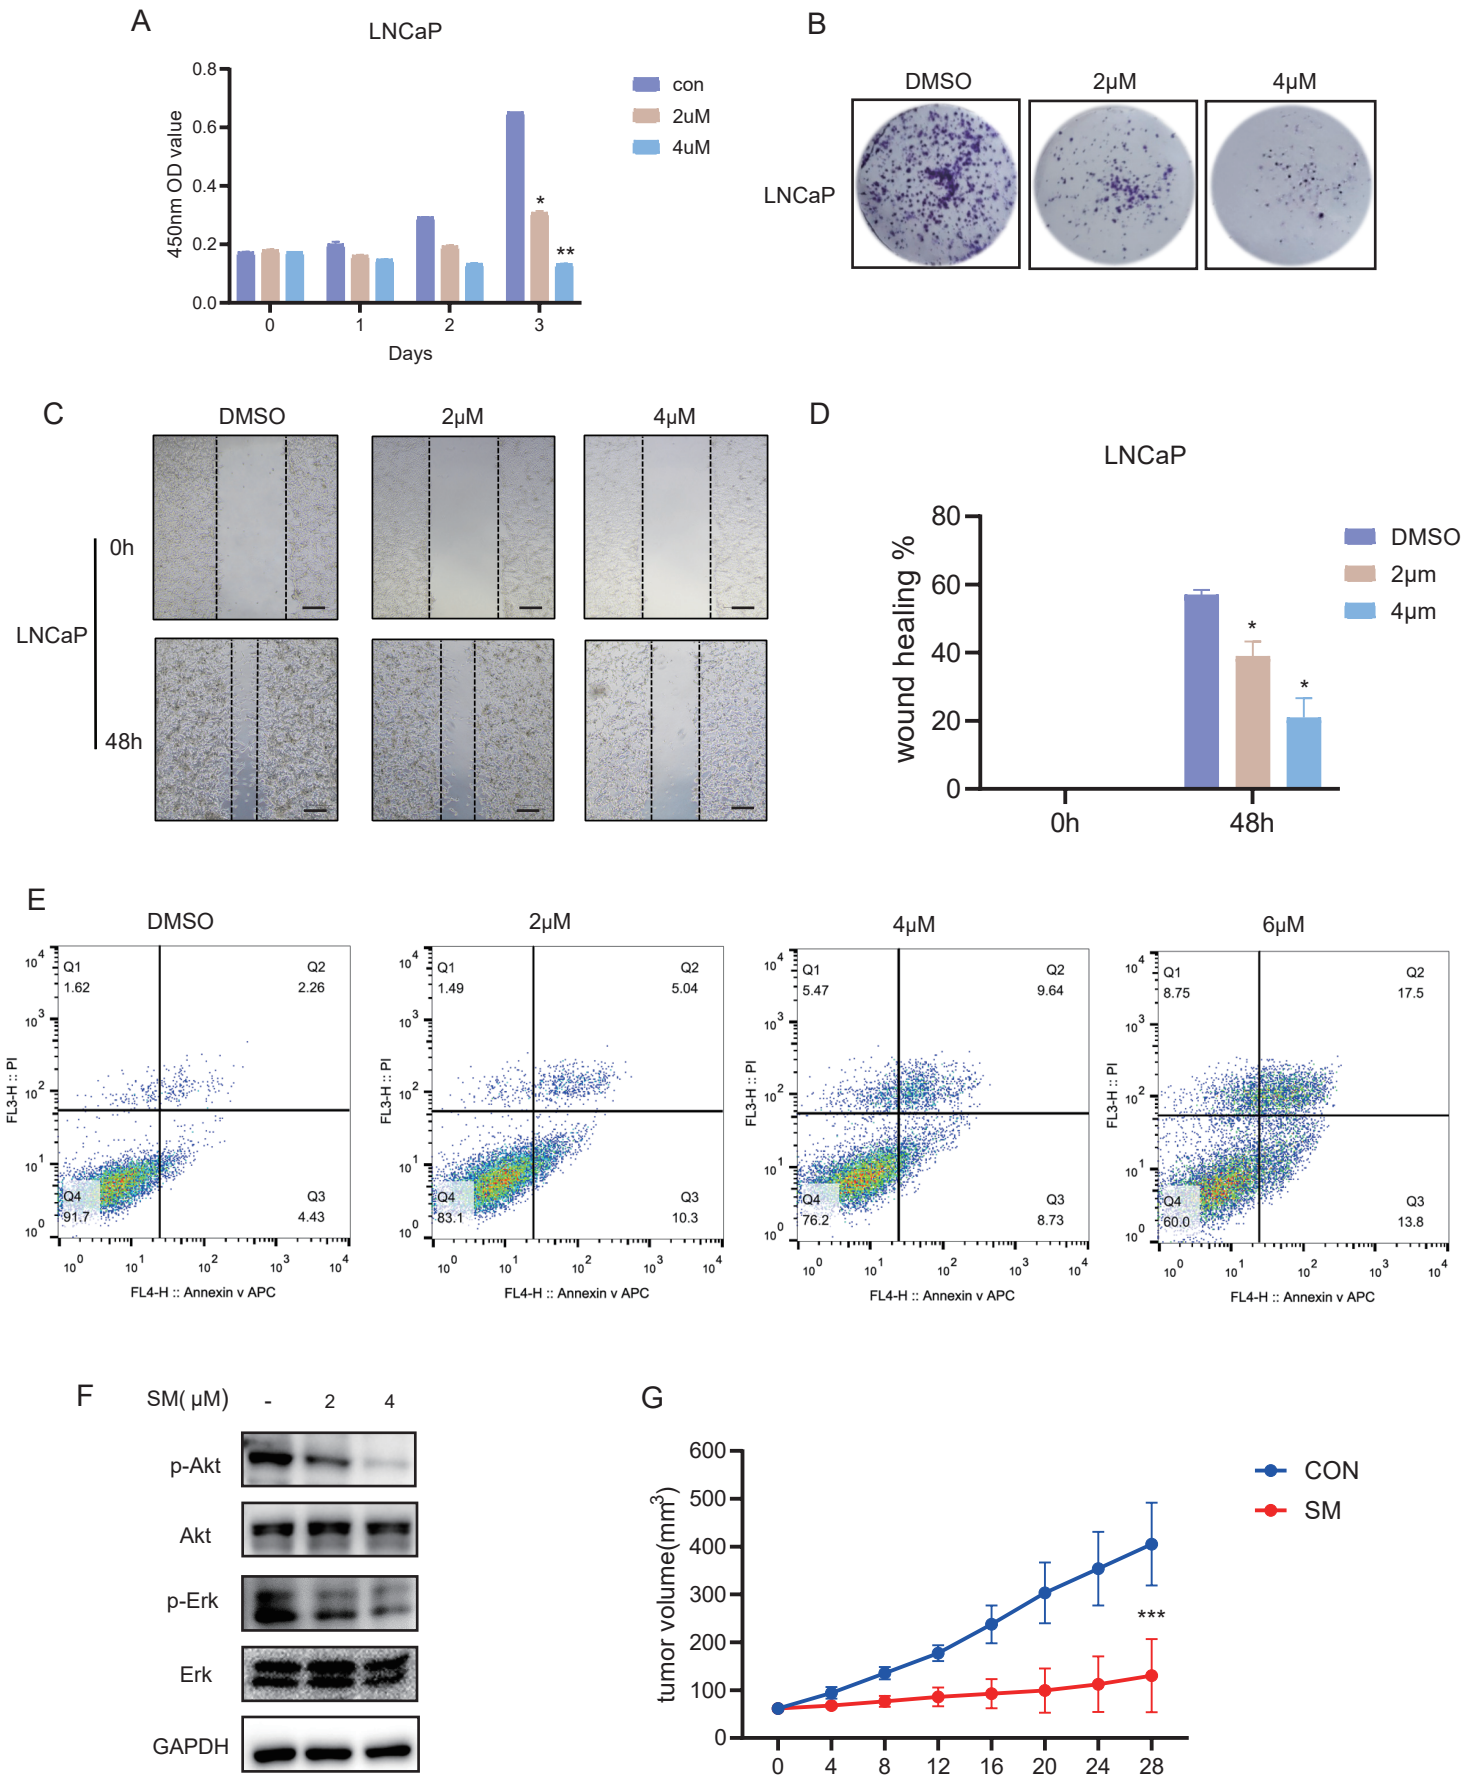

Supplement: f1 [file 9055954.f1.pdf]
